# Supplementary material
Source: Springer Nature journal article supplement (https://www.springermedizin.de/resource/supplementary/13022_2013_71_MOESM1_ESM.pdf/9641408)

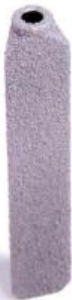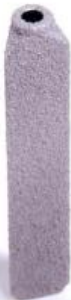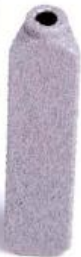

Supplement: MOESM1 [file 9641408]
